# Supplementary material
Source: publisher site journal article supplement (https://www.dovepress.com/article/432821)
Supplement: Supplementary file 1 [file get_supplementary_file.php]

**Supplementary Table 1: Search Strategy.**

**PubMed: 401 returned**

| Search | Query | Items found |
| --- | --- | --- |
| #1 | (((("breast cancer*"[Title/Abstract] OR "breast neoplasm*"[Title/Abstract] OR "breast carcinoma"[Title/Abstract] OR ("breast neoplasms"[MeSH Terms] OR ("Breast"[All Fields] AND "neoplasms"[All Fields]) OR "breast neoplasms"[All Fields] OR ("Breast"[All Fields] AND "tumor"[All Fields]) OR "breast tumor"[All Fields])) AND "s"[Title/Abstract]) OR ("breast neoplasms"[MeSH Terms] OR ("Breast"[All Fields] AND "neoplasms"[All Fields]) OR "breast neoplasms"[All Fields] OR ("Breast"[All Fields] AND "tumour"[All Fields]) OR "breast tumour"[All Fields])) AND "s"[Title/Abstract]) OR "breast onco*"[Title/Abstract] | 60,823 |
| #2 | (((((((((((("therapeutics"[MeSH Terms] OR "therapeutics"[All Fields] OR "treatments"[All Fields] OR "therapy"[MeSH Subheading] OR "therapy"[All Fields] OR "treatment"[All Fields] OR "treatment s"[All Fields]) AND "s"[Title/Abstract]) OR ("therapeutics"[MeSH Terms] OR "therapeutics"[All Fields] OR "therapies"[All Fields] OR "therapy"[MeSH Subheading] OR "therapy"[All Fields] OR "therapy s"[All Fields] OR "therapys"[All Fields])) AND "s"[Title/Abstract]) OR "Drug"[All Fields]) AND "s"[Title/Abstract]) OR ("medicin"[All Fields] OR "medicinal"[All Fields] OR "medicinally"[All Fields] OR "medicinals"[All Fields] OR "medicine"[MeSH Terms] OR "medicine"[All Fields] OR "medicine s"[All Fields] OR "medicines"[All Fields])) AND "s"[Title/Abstract]) OR ("biopharmaceutics"[MeSH Terms] OR "biopharmaceutics"[All Fields] OR "pharmaceutic"[All Fields] OR "pharmaceutics"[All Fields] OR "pharmaceutical preparations"[MeSH Terms] OR ("pharmaceutical"[All Fields] AND "preparations"[All Fields]) OR "pharmaceutical preparations"[All Fields] OR "pharmaceutical"[All Fields] OR "pharmaceuticals"[All Fields] OR "pharmaceutical s"[All Fields] OR "pharmaceutically"[All Fields])) AND "s"[Title/Abstract]) OR "Chemotherapy"[Title/Abstract] OR "hormonal therapy"[Title/Abstract] OR "endocrine therapy"[Title/Abstract] OR "targeted therapy"[Title/Abstract] OR "Immunotherapy"[Title/Abstract] OR "Neoadjuvant"[Title/Abstract] OR "systemic therapy"[Title/Abstract] OR ("surgery"[MeSH Subheading] OR "surgery"[All Fields] OR "surgical procedures, operative"[MeSH Terms] OR ("surgical"[All Fields] AND "procedures"[All Fields] AND "operative"[All Fields]) OR "operative surgical procedures"[All Fields] OR "general surgery"[MeSH Terms] OR ("general"[All Fields] AND "surgery"[All Fields]) OR "general surgery"[All Fields] OR "surgery s"[All Fields] OR "surgerys"[All Fields] OR "surgeries"[All Fields])) AND "s"[Title/Abstract]) OR "Mastectomy"[Title/Abstract] OR "Lumpectomy"[Title/Abstract] OR "Radiation"[Title/Abstract] | 3,149,509 |
| #3 | "patient perspective*"[Title/Abstract] OR "patient s perspective"[Title/Abstract] OR "patients perspectives"[Title/Abstract] OR "patient preference*"[Title/Abstract] OR "patient s preference"[Title/Abstract] OR "patients preferences"[Title/Abstract] OR "patient perception*"[Title/Abstract] OR "patient s perception"[Title/Abstract] OR "patients perceptions"[Title/Abstract] OR "patient view*"[Title/Abstract] OR "patient s view"[Title/Abstract] OR "patients views"[Title/Abstract] OR "patient experience*"[Title/Abstract] OR "patient s experience"[Title/Abstract] OR "patients experiences"[Title/Abstract] | 65,994 |
| #4 | #1 AND #2 AND #3 | 639 |
| #5 | Limit: Publication date Jan 2010 to Jun 2023; Full text only; Human only; English only | 401 |

**SCOPUS: 1,240 returned**

| Search | Query | Items found |
| --- | --- | --- |
| #1 | TITLE-ABS-KEY (breast AND cancer* OR breast AND neoplasm* OR breast AND carcinoma OR breast AND tumor* OR breast AND tumour* OR breast AND onco*) | 95,429 |
| #2 | TITLE-ABS-KEY (treatment* OR therapy* OR drug* OR medicine* OR pharmaceutical* OR chemotherapy OR hormonal AND therapy OR endocrine AND therapy OR targeted AND therapy OR immunotherapy OR neoadjuvant OR systemic AND therapy OR surger* OR mastectomy OR lumpectomy OR radiation) | 5,292,977 |
| #3 | TITLE-ABS-KEY (patient AND perspective* OR patient’s AND perspective OR patients’ AND perspectives OR patient AND preference* OR patient’s AND preference OR patients’ AND preferences OR patient AND perception* OR patient’s AND perception OR patients’ AND perceptions OR patient AND view* OR patient’s AND view OR patients’ AND views OR patient AND experience* OR patient’s AND experience OR patients’ AND experiences) | 635,245 |
| #4 | #1 AND #2 AND #3 | 1,879 |
| #5 | Limit: Publication date Jan 2010 to Jun 2023; English only; Document type article, review, book chapter, and short survey only | 1,240 |

**CINAHL Plus: 400 returned**

| Search | Query | Items found |
| --- | --- | --- |
| #1 | TI (Breast cancer* OR Breast neoplasm* OR Breast carcinoma OR Breast tumor(s) OR Breast tumour(s) OR Breast onco*) OR AB (Breast cancer* OR Breast neoplasm* OR Breast carcinoma OR Breast tumor(s) OR Breast tumour(s) OR Breast onco*) | 98,174 |
| #2 | TI ( Treatment(s) OR Therapy(s) OR Drug(s) OR Medicine(s) OR Pharmaceutical(s) OR Chemotherapy OR Hormonal therapy OR Endocrine therapy OR Targeted therapy OR Immunotherapy OR Neoadjuvant OR Systemic therapy OR Surgery(s) OR Mastectomy OR Lumpectomy OR Radiation ) OR AB ( Treatment(s) OR Therapy(s) OR Drug(s) OR Medicine(s) OR Pharmaceutical(s) OR Chemotherapy OR Hormonal therapy OR Endocrine therapy OR Targeted therapy OR Immunotherapy OR Neoadjuvant OR Systemic therapy OR Surgery(s) OR Mastectomy OR Lumpectomy OR Radiation ) | 189,184 |
| #3 | TI ( Patient perspective* OR Patient’s perspective OR Patients’ perspectives OR Patient preference* OR Patient’s preference OR Patients’ preferences OR Patient perception* OR Patient’s perception OR Patients’ perceptions OR Patient view* OR Patient’s view OR Patients’ views OR Patient experience* OR Patient’s experience OR Patients’ experiences ) OR AB ( Patient perspective* OR Patient’s perspective OR Patients’ perspectives OR Patient preference* OR Patient’s preference OR Patients’ preferences OR Patient perception* OR Patient’s perception OR Patients’ perceptions OR Patient view* OR Patient’s view OR Patients’ views OR Patient experience* OR Patient’s experience OR Patients’ experiences ) | 125,617 |
| #4 | #1 AND #2 AND #3 | 1,330 |
| #5 | Limit: Publication date Jan 2010 to Jun 2023; Full text only; English only | 400 |
